# Supplementary material for: Definite coordination arrangement of organometallic palladium complexes accumulated on the designed interior surface of apo-ferritin
Source: Royal Society of Chemistry journal article supplement (doi:10.1039/c0cc02221g), 2010-08-23
Supplement: c0cc02221g.pdf [file c0cc02221g.pdf]

Electronic Supplementary Information

**Definite Coordination Arrangement of Organometallic  
Palladium Complexes on the Designed Interior Surface of  
Apo-ferritin**

**Ziyue Wang,<sup>a</sup> Yusuke Takezawa,<sup>b</sup> Hiroki Aoyagi,<sup>a</sup> Satoshi Abe,<sup>c</sup> Tatsuo Hikage,<sup>d</sup>  
Yoshihito Watanabe,<sup>a,b</sup> Susumu Kitagawa<sup>c,e</sup> and Takafumi Ueno<sup>\*c,f</sup>**

<sup>a</sup> Department of Chemistry, Graduate School of Science, Nagoya University, Furo-cho, Nagoya 464-8602, Japan.

<sup>b</sup> Research Center for Material Science, Nagoya University, Furo-cho, Nagoya, 464-8602, Japan.

<sup>c</sup> Institute for Integrated Cell-Material Sciences (iCeMS), Funai Center, Kyoto University, Katsura, Nishikyoku-ku, Kyoto, 615-8510, Japan.

E-mail: taka@icems.kyoto-u.ac.jp.

<sup>d</sup> High Intensity X-ray Diffraction Laboratory, Nagoya University, Furo-cho, Nagoya, 464-8602, Japan.

<sup>e</sup> Department of Synthetic Chemistry and Biological Chemistry, Graduate School of Engineering, Kyoto University, Katsura, Nishikyoku-ku, Kyoto, 615-8510, Japan.

<sup>f</sup> PRESTO, Japan Science and Technology Agency (JST), Honcho, Kawaguchi, Saitama, 332-0012, Japan.

## Experiment Section

**Materials.** Reagents were purchased from TCI, Wako, Nacalai Tesque, and Sigma-Aldrich and used without further purification. Apo recombinant L-chian ferritin from horse liver (apo-rHLFr) was prepared in NovaBlue competent cells (Novagen) transformed with the expression vector pMK2. Apo-rHLFr mutants, **apo-E45C/C48A-rHLFr**, **apo-E48C/R52H-rHLFr** and **apo-E45C/H49A/R52H-rHLFr** were prepared using QuikChange Site-Directed Mutagenesis Kit (Stratagene). The culture and purification of the proteins were performed according to a previous literature.<sup>1</sup> The preparation of Pd(allyl)·apo-rHLFr mutants and the evaluation of their catalytic reactivity were done by the methods reported previously.<sup>2</sup>

**Preparation of Pd(allyl)·apo-rHLFr Mutants.** **Pd(allyl)·apo-E45C/C48A-rHLFr**, **Pd(allyl)·apo-E48C/R52H-rHLFr** and **Pd(allyl)·apo-E45C/H49A/R52H-rHLFr** were prepared by the process described below: 500  $\mu$ L [Pd(allyl)Cl]<sub>2</sub> solution (20 mM in acetonitrile) was added into 5 mL apo-rHLFr solution (10  $\mu$ M in the buffer of Tris/HCl (50 mM, pH = 8)). The mixture was stirred for 1 hour at room temperature and then dialyzed against 2 L NaCl solution (0.15 M) at 4 °C overnight. The product Pd(allyl)·apo-rHLFr mutants were obtained after purifying the reaction mixture with Superdex G200 size-exclusion chromatography using NaCl solution (0.15 M) as the eluent. The number of Pd atoms in Pd(allyl)·apo-rHLFr mutants were determined by inductively coupled plasma-optical emission spectrometry (ICP-OES) and bicinchoninate (BCA) method.

**Crystallization of Pd(allyl)·apo-rHLFr Mutants.** Hanging drop vapor diffusion method as described in previous reports<sup>2-4</sup> was used to crystallize Pd(allyl)·apo-rHLFr mutants. The solutions of Pd(allyl)·apo-rHLFr mutants were concentrated to about 30 mg/mL in NaCl solution (0.15 M). The drops were prepared by mixing an equal volume (3  $\mu$ L) of the protein solution and the precipitant solution (1 M (NH<sub>4</sub>)<sub>2</sub>SO<sub>4</sub>, 15-20 mM CdSO<sub>4</sub>), and then equilibrated against the same precipitant solution (1 mL) at 20 °C. The crystals were produced within one day.

**X-ray Crystallography and Data Refinement.** After crystallization, single crystals of Pd(allyl)·apo-rHLFr mutants were immersed in a precipitant solution containing 30% (w/w) ethylene glycol and subsequently frozen in liquid nitrogen. X-ray diffraction data of Pd(allyl)·apo-rHLFr mutants were collected at 100 K at beamline BL38B1 of SPring-8 using X-ray with wavelength of 1.0 Å. The data was processed using HKL2000 programs as cubic *F*432 space group. Refinement of the protein structure was performed using *REFMAC5*<sup>5</sup> of the *CCP4* suite and rebuilding was performed using *COOT*<sup>6</sup> based on sigma weighted ( $2F_o - F_c$ ) and ( $F_o - F_c$ ) electron density maps. The crystal parameters, data collection statistics and refinement statistics are summarized in Table S1. Atomic coordinates are deposited in the Protein Data Bank under accession numbers 3NP2, 3NOZ, and 3NP0 for **Pd(allyl)·apo-E45C/C48A-rHLFr**, **Pd(allyl)·apo-E45C/R52H-rHLFr** and **Pd(allyl)·apo-E45C/H49A/R52H-rHLFr**, respectively. Residue Ser1 and Asp174 in **Pd(allyl)·apo-E45C/C48A-rHLFr** were not decided because of their disordered electron densities. Residue Glu130 and Gln158 in **Pd(allyl)·apo-E45C/C48A-rHLFr**, Asp127, Glu130, Ser131 and His132 in **Pd(allyl)·apo-E45C/R52H-rHLFr**, and His49, Asp127, Glu130, Ser131, His132, Glu136, Lys172 and

Asp174 in **Pd(allyl)•apo-E45C/H49A/R52H-rHLFr** were replaced to Ala because electron densities of these residues are missing.

### Suzuki Coupling Reaction.

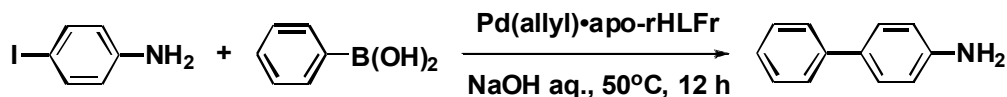

The reactions were performed in an aqueous solution of 0.15 M NaCl which contained *p*-I-PhNH<sub>2</sub> (2.5 mM) and PhB(OH)<sub>2</sub> (5.2 mM) as substrates, NaOH (4.5 mM) as the base and Pd(allyl)•apo-rHLFr mutant (0.025 μM) as catalyst. After incubation at 50 °C for 12 h, the reactions were terminated by adding HCl to pH 1.9. The mixtures were extracted with chloroform and then the solvent was removed by vacuum evaporation. By analysis with <sup>1</sup>H-NMR spectroscopy, the turnover frequencies (TOF = [product (mol)] per Pd(allyl)•apo-rHLFr per hour) of the coupling reactions were calculated based on the consumption of *p*-I-PhNH<sub>2</sub> and the formation of the product.

### Reference

1. K. Iwahori, K. Yoshizawa, M. Muraoka and I. Yamashita, *Inorg. Chem.*, 2005, **44**, 6393-6400.
2. S. Abe, J. Niemeyer, M. Abe, Y. Takezawa, T. Ueno, T. Hikage, G. Erker and Y. Watanabe, *J. Am. Chem. Soc.*, 2008, **130**, 10512-10514.
3. T. Granier, G. Comberton, B. Gallois, B. L. d'Estaintot, A. Dautant, R. R. Crichton and G. Precigoux, *Proteins-Struct. Funct. Bioinfo.*, 1998, **31**, 477-485.
4. P. D. Hempstead, S. J. Yewdall, A. R. Fernie, D. M. Lawson, P. J. Artymiuk, D. W. Rice, G. C. Ford and P. M. Harrison, *J. Mol. Biol.*, 1997, **268**, 424-448.
5. G. N. Murshudov, A. A. Vagin and E. J. Dodson, *Acta Crystallogr. Sect. D*, 1997, **53**, 240-255.
6. P. Emsley and K. Cowtan, *Acta Crystallogr. Sect. D*, 2004, **60**, 2126-2132.

**Table S1.** Summary of X-ray Data and Refinement Statistics for **Pd(allyl)·apo-rHLFr Mutants**.

|                                              | <b>Pd(allyl)·apo-<br/>E45C/C48A-rHLFr</b> | <b>Pd(allyl)·apo-<br/>E45C/R52H-rHLFr</b> | <b>Pd(allyl)·apo-E45C<br/>/H49A/R52H-rHLFr</b> |
|----------------------------------------------|-------------------------------------------|-------------------------------------------|------------------------------------------------|
| <b>Data collection statistics</b>            |                                           |                                           |                                                |
| X-ray wavelength, Å                          | 1.0000                                    | 1.0000                                    | 1.0000                                         |
| Space group                                  | <i>F432</i>                               | <i>F432</i>                               | <i>F432</i>                                    |
| Unit cell, Å                                 | 182.296                                   | 181.427                                   | 180.959                                        |
| Resolution range<br>(outer shell) (Å)        | 30-1.86<br>(1.93-1.86)                    | 25-1.52<br>(1.57-1.52)                    | 30-1.48<br>(1.53-1.48)                         |
| Total observations                           | 423,914                                   | 751,588                                   | 765,474                                        |
| Unique reflections                           | 40,701                                    | 73,696                                    | 78,341                                         |
| Completeness (%) <sup>a</sup>                | 98.6 (100)                                | 99.2 (93.9)                               | 98.3 (88.7)                                    |
| <i>R</i> <sub>merge</sub> (%) <sup>a,b</sup> | 12.7 (28.5)                               | 5.4 (34.7)                                | 6.4 (28.6)                                     |
| <i>I</i> /σ ( <i>I</i> ) <sup>a</sup>        | 65.9 (19.5)                               | 59.9 (5.3)                                | 66.6 (7.3)                                     |
| <b>Refinement statistics</b>                 |                                           |                                           |                                                |
| Resolution (Å)                               | 24.36-1.86                                | 19.34-1.52                                | 19.29-1.48                                     |
| No. reflections    Working set/test          | 19,613/1,049                              | 37,012/1,951                              | 39,184/2,070                                   |
| <i>R</i> -factor (%) <sup>c</sup>            | 19.9                                      | 19.5                                      | 19.8                                           |
| <i>R</i> <sub>free</sub> (%) <sup>d</sup>    | 22.8                                      | 20.8                                      | 21.0                                           |
| <b>Final model</b>                           |                                           |                                           |                                                |
| No. of residues                              | 172 (2-173)                               | 174 (1-174)                               | 174 (1-174)                                    |
| No. of water molecules                       | 165                                       | 173                                       | 211                                            |
| No. of Pd complexes and Pd atoms             | 4                                         | 6                                         | 6                                              |
| No. of Cd atoms                              | 2                                         | 1                                         | 1                                              |
| No. of Sulfate ions                          | 1                                         | 1                                         | 2                                              |
| No. of ethylene glycol                       | 8                                         | 9                                         | 8                                              |
| rms deviation from ideality                  |                                           |                                           |                                                |
| Bonds (Å)                                    | 0.018                                     | 0.016                                     | 0.012                                          |
| Angle (°)                                    | 1.519                                     | 1.598                                     | 1.613                                          |
| Ramachandran plot (%) <sup>e</sup>           |                                           |                                           |                                                |
| most favored                                 | 93.6                                      | 91.8                                      | 91.8                                           |
| allowed                                      | 6.4                                       | 8.2                                       | 8.2                                            |

<sup>a</sup> Values in parentheses are for the highest resolution shell. <sup>b</sup>  $R_{\text{merge}} = \sum |I - \langle I \rangle| / \sum I$ , where *I* is the integrated intensity of a given reflection. <sup>c</sup>  $R = \sum ||F_o| - |F_c|| / \sum |F_o|$ , where *F*<sub>o</sub> and *F*<sub>c</sub> are the observed and calculated structure factor amplitudes, respectively. <sup>d</sup> *R*<sub>free</sub>: an *R* factor calculated on a partial set that is not used in the refinement of the structure. <sup>e</sup> Ramachandran plot parameters were calculated using *PROCHECK*.

**Table S2.** Selected Distances of Pd–S(Cys), Pd–N<sup>□</sup>(His), Pd–O(H<sub>2</sub>O), and Pd–Pd in the accumulation centers of **Pd(allyl)·apo-rHLFr Mutants**.

|                                           | Pd–X distances (Å) |
|-------------------------------------------|--------------------|
| <b>Pd(allyl)·apo-E45C/C48A-rHLFr</b>      |                    |
| PdB1–S <sup>γ</sup> (Cys45)               | 2.40               |
| PdB1–N <sup>ε</sup> (His173)              | 2.98               |
| PdB2–S <sup>γ</sup> (Cys45)               | 2.27               |
| PdB2–N <sup>ε</sup> (His49)               | 1.92               |
| PdB1–PdB2                                 | 3.21               |
| <b>Pd(allyl)·apo-E45C/R52H-rHLFr</b>      |                    |
| PdC1–S <sup>γ</sup> (Cys45)               | 2.26               |
| PdC1–N <sup>ε</sup> (His173)              | 2.22               |
| PdC2–S <sup>γ</sup> (Cys45)               | 2.39               |
| PdC2–N <sup>ε</sup> (His49)               | 2.04               |
| PdC1–PdC2                                 | 3.19               |
| PdC3–S <sup>γ</sup> (Cys48)               | 2.41               |
| PdC3–N <sup>δ</sup> (His52)               | 2.12               |
| PdC4–S <sup>γ</sup> (Cys48)               | 2.36               |
| PdC4–O(WC1)                               | 2.27               |
| PdC3–PdC4                                 | 3.32               |
| <b>Pd(allyl)·apo-E45C/H49A/R52H-rHLFr</b> |                    |
| PdD1–S <sup>γ</sup> (Cys45)               | 2.38               |
| PdD1–N <sup>δ</sup> (His173)              | 2.29               |
| PdD2–S <sup>γ</sup> (Cys45)               | 2.32               |
| PdD2–O(WD1)                               | 2.35               |
| PdD1–PdD2                                 | 3.44               |
| PdD3–S <sup>γ</sup> (Cys48)               | 2.37               |
| PdD3–N <sup>δ</sup> (His52)               | 2.21               |
| PdD4–S <sup>γ</sup> (Cys48)               | 2.44               |
| PdD4–O(WD2)                               | 2.36               |
| PdD3–PdD4                                 | 3.21               |
| <b>Pd(allyl)·apo-rHLFr<sup>a</sup></b>    |                    |
| PdA1–S <sup>γ</sup> (Cys48)               | 2.57               |
| PdA1–N <sup>δ</sup> (His49)               | 2.17               |
| PdA2–S <sup>γ</sup> (Cys48)               | 2.31               |
| PdA2–O <sup>ε</sup> (Glu45)               | 2.30               |
| PdA1–PdA2                                 | 3.12               |

<sup>a</sup> The structure was taken from PDB (PDB ID: 2ZG7).

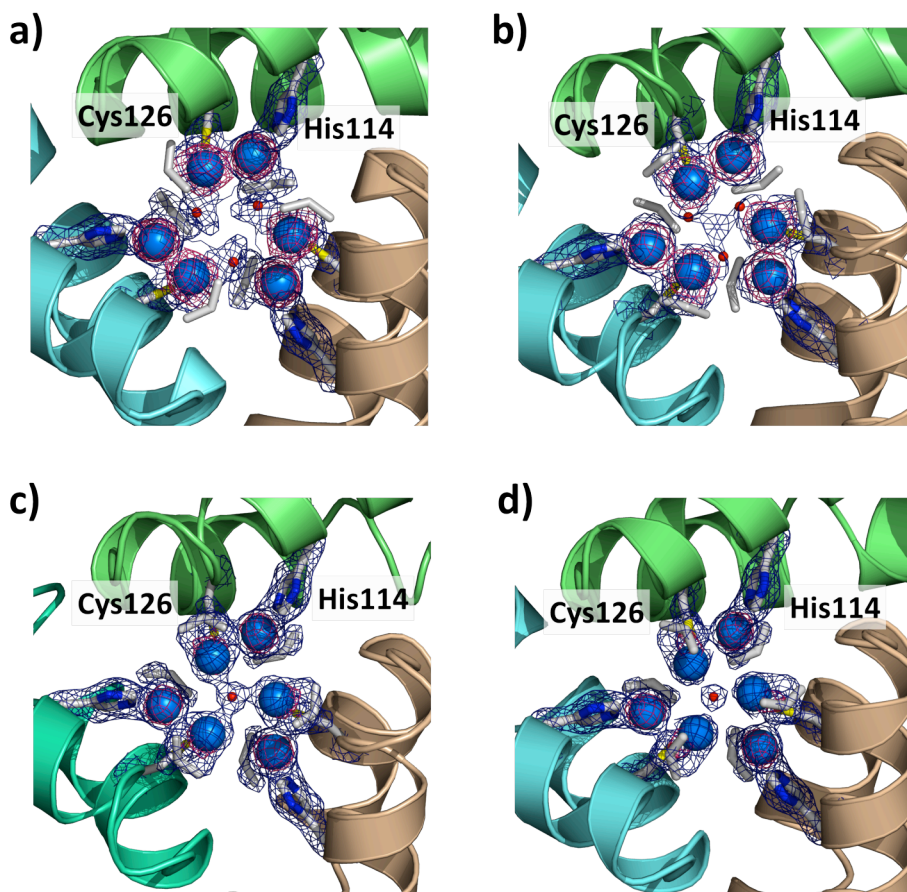

**Fig. S1.** The 3-fold channels of **Pd(allyl)·apo-rHLFr** (a), **Pd(allyl)·apo-E45C/C48A-rHLFr** (b), **Pd(allyl)·apo-E45C/R52H-rHLFr** (c), and **Pd(allyl)·apo-E45C/H49A/R52H-rHLFr** (d). The Pd atoms are indicated as sphere models colored in cyan. The O atoms of water molecules are shown as red spheres. The anomalous difference Fourier maps at 4.0  $\sigma$  indicate the positions of palladium atoms that are shown in magenta. The selected  $2|F_o| - |F_c|$  electron density maps at 1.0  $\sigma$  are shown in blue.

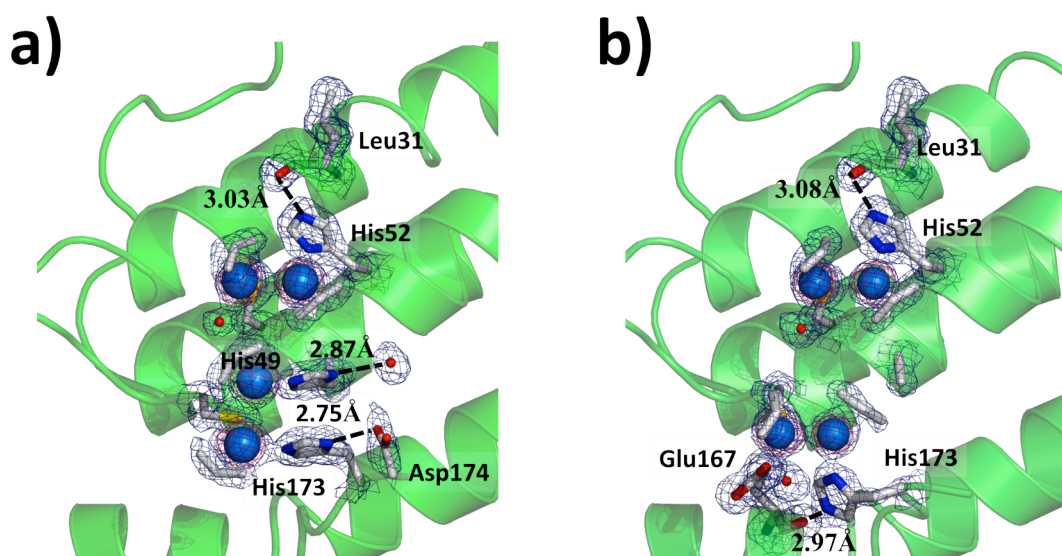

**Fig. S2.** Hydrogen bonds of His49, His52, and His173 in **Pd(allyl)·apo-E45C/R52H-rHLFr** (a), and hydrogen bonds of His52 and His173 **Pd(allyl)·apo-E45C/H49A/R52H-rHLFr** (b).
